# Supplementary material for: A dual cross-linked aromatic polythiourea gate dielectric with multifunctional capabilities for organic field-effect transistors
Source: Royal Society of Chemistry journal article supplement (doi:10.1039/d0tc03617j), 2020-12-12
Supplement: d0tc03617j1.pdf [file d0tc03617j1.pdf]

*Electronic Supplementary Information for*

## **A dual cross-linked aromatic polythiourea gate dielectric with multifunctional capabilities for organic field-effect transistors**

Sungmi Yoo,<sup>‡a</sup> Hyunjin Park,<sup>‡a</sup> Yong Seok Kim,<sup>ab</sup> Jong Chan Won,<sup>ab</sup> Dong-Gyun Kim,<sup>\*a</sup> and Yun Ho Kim<sup>\*ab</sup>

<sup>a</sup>Advanced Materials Division, Korea Research Institute of Chemical Technology, 141 Gajeong-ro, Yuseong-gu, Daejeon 34114, Republic of Korea

<sup>b</sup>Chemical Convergence Materials and Processes, University of Science and Technology, 217 Gajeong-ro, Yuseong-gu, Daejeon 34114, Republic of Korea

<sup>‡</sup>These authors contributed equally to this work.

*\*Corresponding author: D.-G. Kim (E-mail: dgkim@kRICT.re.kr)  
Y. H. Kim (E-mail: yunho@kRICT.re.kr)*

### Table of Contents

| Experimental                                                                       | Section |
|------------------------------------------------------------------------------------|---------|
| .....                                                                              |         |
| 2                                                                                  |         |
| Synthesis of Aromatic Polythiourea (PTU).....                                      |         |
| 6                                                                                  |         |
| Structural and Thermal Characterization of Cross-Linked PTU (c-PTU) Thin Films ... | 8       |
| Electrical Properties of c-PTU and Surface-Treated c-PTU (sc-PTU) Thin Films ..... | 10      |
| Surface Properties of c-PTU and sc-PTU Thin Films .....                            | 14      |
| References for Electronic Supplementary Information                                |         |
| .....                                                                              | 16      |

## Experimental Section

### Materials

1,1'-Thiocarbonyldiimidazole (TCDI, tech. 90%, Alfa Aesar), dinaphtho[2,3-b:2',3'-f]thieno[3,2-b]thiophene (DNTT, >99%, Sigma-Aldrich), aluminum(III) nitrate nonahydrate ( $\text{Al}(\text{NO}_3)_3 \cdot 9\text{H}_2\text{O}$ , >99.997%, Sigma-Aldrich), octadecylphosphonic acid (ODPA, 97%, Sigma-Aldrich), pentaerythritol tetrakis(3-mercaptopropionate) (PETMP, >95%, Sigma-Aldrich), N-methyl-2-pyrrolidone (NMP, anhydrous, 99.5%, Sigma-Aldrich), 4,4'-Oxydianiline (ODA, >98%, Tokyo Chemical Industry) were used as received. All other reagents and solvents were used as received from standard vendors.

### Synthesis of Polythiourea from TCDI and ODA

Aromatic polythiourea (PTU) was synthesized by polycondensation of TCDI and ODA in NMP (Fig. S1). Preparation procedure was conducted under a nitrogen atmosphere in a glove box (<0.1 ppm of  $\text{H}_2\text{O}$  and  $\text{O}_2$ ). ODA (5.1 g, 25 mmol) and NMP (60 mL) were placed into a 100 mL round-bottomed flask with a magnetic stirring bar, and TCDI (5.0 g, 28 mmol) was added into the flask under stirring. The reaction flask sealed with stopper was transferred to a thermostatted oil bath at 90 °C outside the glove box. After stirred for 24 h, the solution was precipitated into an excess of methanol. The dissolution-precipitation procedure was repeated three times. The resulting precipitate was subsequently dried under vacuum at 70 °C for 24 h, yielding a yellowish white solid (5.2 g, 72%).  $^1\text{H}$  NMR (400 MHz,  $\text{DMSO-d}_6$ ,  $\delta/\text{ppm}$ , tetramethylsilane (TMS) ref) (Fig. S2): 9.70 (br, C(S)NH), 9.60 (br, C(S)NH of end-group), 7.45–7.43, 6.99–6.97 (Ar-H), 7.33–7.31, 6.83–6.80, 6.77–6.75, 6.59–6.57 (Ar-H of end-group). GPC-RI analysis: number-average molecular weight ( $M_n$ ) = 12,700  $\text{g mol}^{-1}$ , molecular weight dispersity ( $D$ ) = 1.92.

### Fabrication of Cross-Linked PTU Thin Film

Dual cross-linked PTU films are designated as c-PTU#, where # indicates the molar feed ratio of the thiol group of PETMP to the thiourea group of PTU ([thiol]/[thiourea]) in the film. The # was controlled from 0.2 to 1.0 at 0.2 intervals to optimize the dielectric properties of c-PTUs. To prepare 200 nm-thick c-PTU films, appropriate amounts of PTU, PETMP, and Irgacure® 819 (a photo-initiator, 5 wt% to the PTU and PETMP) were dissolved in NMP. The total feed concentration was 9 wt% in NMP. The homogeneous mixture solution was spin-coated on a glass substrate and thermally annealed at 90 °C for 1 min. Then, ultraviolet (UV,  $\lambda = 365 \text{ nm}$ ,  $4 \text{ J cm}^{-2}$ ) was irradiated at room temperature to induce the cross-linking reaction between PTU and PETMP. The resultant thin film was thermally annealed at 90 °C for 30 min, followed by vacuum drying at room temperature overnight. For comparison purposes, PTU thin film with similar thickness was also prepared without the PETMP and photo-initiator. Photo-patterned c-PTU thin film was fabricated using the similar procedure, but the UV exposure of  $4 \text{ J cm}^{-2}$  was performed on the spin-coated thin film through 25  $\mu\text{m}$ -line-patterned shadow mask (Fig. S11). After thermal treatment at 90 °C for 30 min, the c-PTU thin film was immersed in NMP solvent for 20 s to develop the patterns and dried under  $\text{N}_2$  flow.

### Metal-Oxide-Assisted Surface Treatment for c-PTU0.6 Thin Film

Metal-oxide-assisted surface treatment (MAST) method<sup>S1</sup> was applied to modify the surface property of c-PTU0.6 thin film. Solution-processed MAST method was composed of  $\alpha\text{-Al}_2\text{O}_3$  layer fabrication and self-assembled monolayer (SAM) treatment (Fig. S12). To fabricate 20 nm-thick  $\alpha\text{-Al}_2\text{O}_3$  layer, 7 wt% solution of aluminum(III) nitrate nonahydrate in 2-butoxyethanol was deposited on the c-PTU0.6 thin film by spin-coating at 2000 rpm for 30 s, followed by thermal treatment on a hot plate at 90 °C for 10 min and 200 °C for 40 min. For the additional SAM treatment, 0.01 wt% solution of ODPA in ethanol was spin-coated on the  $\alpha\text{-Al}_2\text{O}_3$ /c-PTU0.6 double layer thin film at 3000 rpm for 30 s, followed by thermal treatment at 150 °C for 3 min. The excess ODPA residues were washed several times with ethanol. Thickness of ODPA layer was about 2 nm.<sup>S2</sup>

### Device Fabrication

For the fabrication of gate dielectric film, a substrate (glass) was cleaned by sonication in deionized (DI) water, acetone, and isopropanol sequentially for every 20 min at room

temperature. Then, the cleaned substrate was dried in a convection oven at 60 °C for 30 min before use. Metal-insulator-metal (MIM) capacitor with the active area of 1 mm<sup>2</sup> was fabricated by depositing the PTU and c-PTU thin films via the above thin-film fabrication procedure between thermally deposited top and bottom aluminum (Al) electrodes. For fabrication of bottom-gate, top-contact organic field-effect transistors (OFETs), a 30 nm-thick Al gate electrode was deposited on the substrate. Once the PTU-based gate dielectrics were deposited, 50 nm-thick DNTT was thermally evaporated on the gate dielectric layers. Finally, a 50 nm-thick gold (Au) was thermally evaporated on the DNTT layers through shadow mask for the formation of source/drain electrodes with a channel length ( $L$ ) and width ( $W$ ) of 100 μm and 1500 μm, respectively. The thermal evaporation rate was 0.3 Å sec<sup>-1</sup> for the Al, DNTT, and Au, respectively, at a pressure of below  $3 \times 10^{-6}$  torr.

### Instrumentation and Characterization

<sup>1</sup>H NMR spectrum was recorded on a Bruker Ascend 400 MHz using DMSO-*d*<sub>6</sub> as a solvent. Number-average molecular weight ( $M_n$ ) and molecular weight dispersity of PTU were determined by gel permeation chromatography (GPC) in dimethyl acetamide (DMAc, with 0.05 M LiBr), using a Waters 1515 Isocratic HPLC pump, a Shodex KF-805L column, and a Waters 2414 Refractive index (RI) detector at 40 °C. The GPC-RI elution time data were calibrated with narrow-distribution polystyrene standards. Thermogravimetric analysis (TGA) was performed using TA Instruments Q5000 under a nitrogen atmosphere. Differential scanning calorimetry (DSC) was run using a TA Instruments DSC Q1000 under a nitrogen atmosphere. Fourier-transform infrared (FTIR) spectra were recorded on a Bruker VERTEX 80v FTIR spectrometer. Raman spectra were collected using Bruker FRA 106/S spectrometer with a 1064 nm Nd:YAG laser. Wide angle X-ray scattering (WAXS) profiles obtained using Rigaku Ultima IV with Scintillation counter detector. The applied max power, voltage, and current were 2kW, 40kV, and 40mA, respectively. The thin-film thickness was measured with an alpha-step surface profiler ( $\alpha$ -step DC50, KLA-Tencor). The contact angles of DI water and diiodomethane were measured using PHOENIX450 contact angle analyzer. Atomic force microscopy (AFM) images were recorded with a tapping mode microscope (Nanoscope IV, Digital Instrument). The capacitance was measured with a precision LCR meter (E4980A, Agilent). The electrical characteristics of OFETs were measured with a semiconductor parameter analyzer (E5272, Agilent). All electrical measurements were performed under ambient atmosphere condition.



## Synthesis of Aromatic Polythiourea

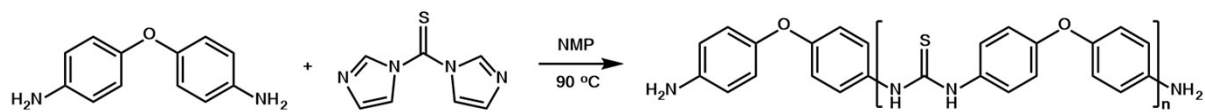

**Fig. S1** Synthesis of aromatic PTU from TCDI and ODA in NMP.

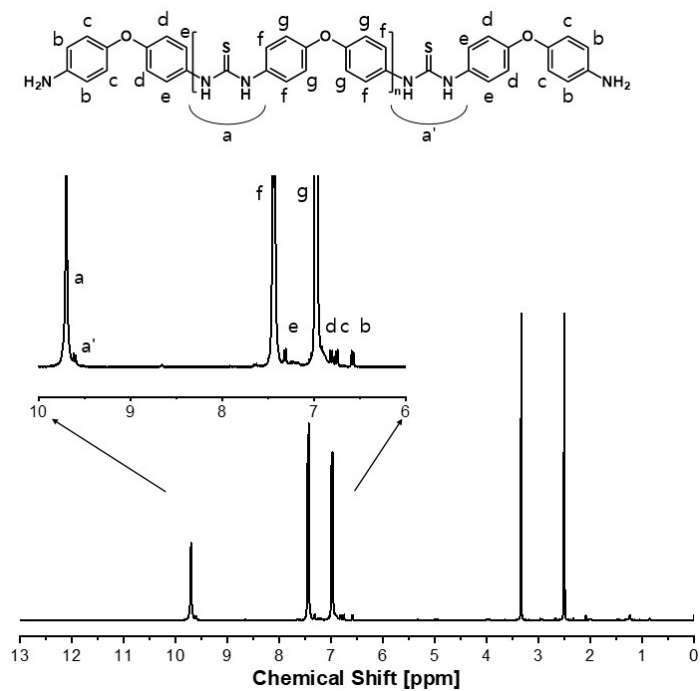

**Fig. S2**  $^1\text{H}$  NMR spectra of PTU.

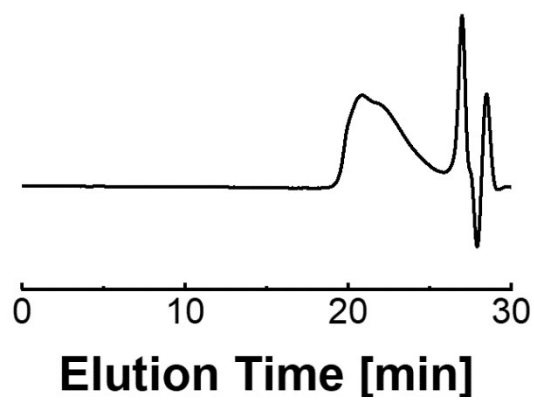

**Fig. S3** GPC trace of PTU in DMAc.

**Table S1** Composition of PTU and PETMP in the c-PTU#s.

| Sample <sup>a</sup> | Molar feed ratio (#) |
|---------------------|----------------------|
|                     | [thiol] / [thiourea] |
| c-PTU0.2            | 0.2 / 1.0            |
| c-PTU0.4            | 0.4 / 1.0            |
| c-PTU0.6            | 0.6 / 1.0            |
| c-PTU0.8            | 0.8 / 1.0            |
| c-PTU1.0            | 1.0 / 1.0            |

<sup>a</sup> Irgacure® 819 (a photo-initiator, 5 wt% to the PTU and PETMP) was added.  
The total feed concentration was 9 wt% in NMP.

## Structural and Thermal Characterization of Cross-Linked PTU (c-PTU) Thin Films

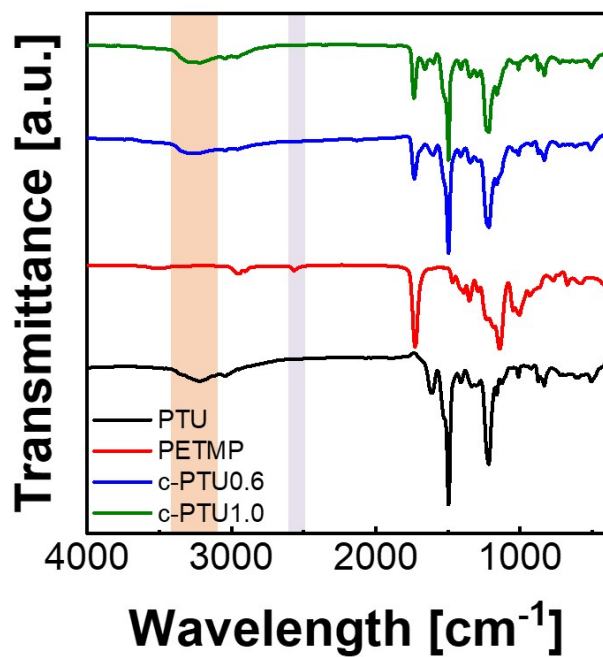

Fig. S4 FTIR spectra of PTU, PETMP, c-PTU0.6 and c-PTU1.0.

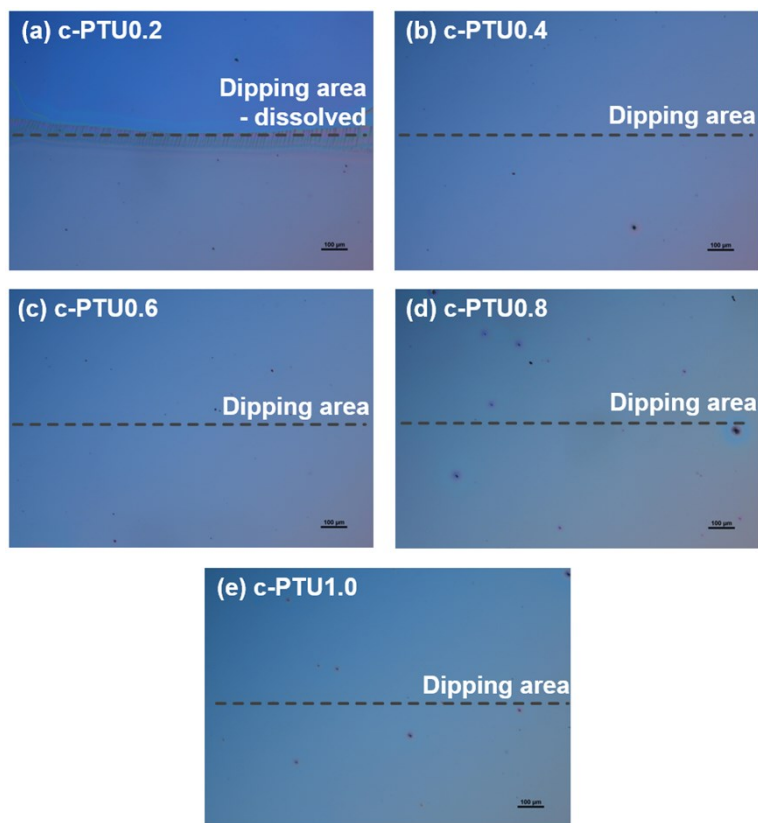

Fig. S5 OM images of c-PTU thin films after immersing in NMP solvent.



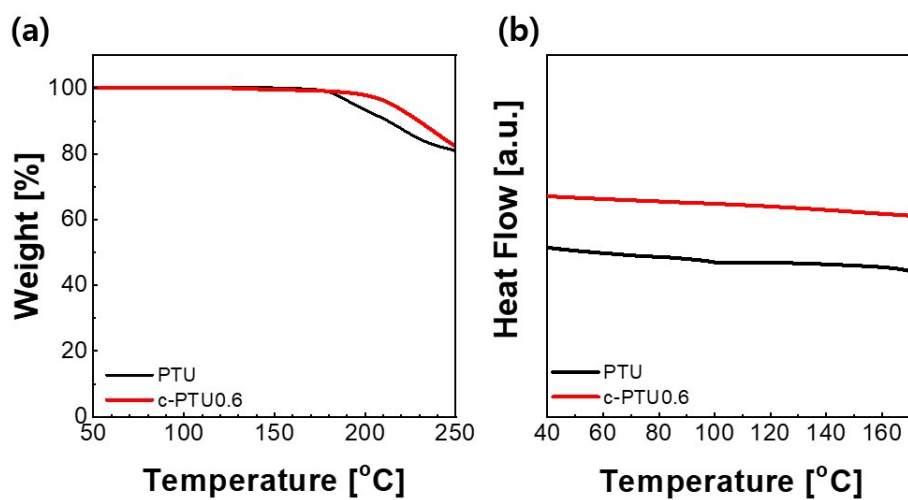

**Fig. S6** (a) TGA and (b) DSC analysis of PTU and c-PTU0.6.

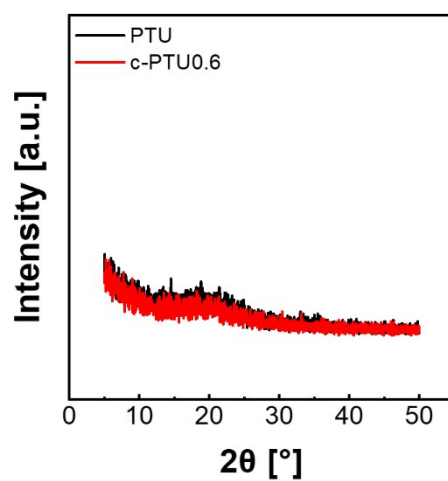

**Fig. S7** WAXS profiles of PTU and c-PTU0.6.

## Electrical Properties of c-PTU and Surface-Treated c-PTU (sc-PTU) Thin Films

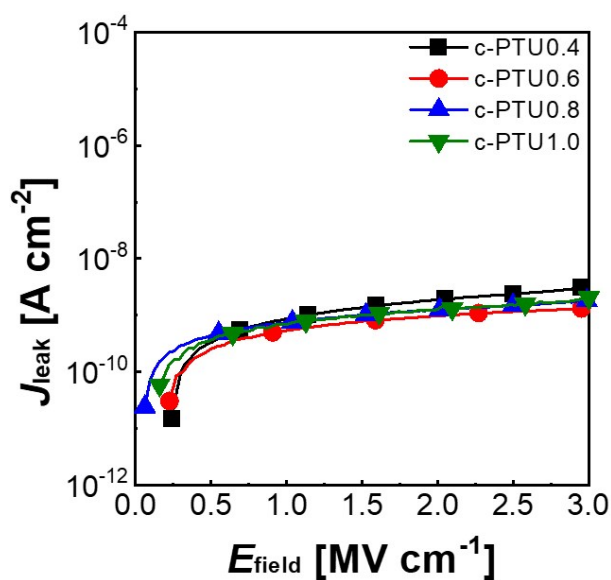

**Fig. S8** Leakage current densities ( $J_{\text{leak}}$ ) as function of electric field ( $E_{\text{field}}$ ) of c-PTU thin films.

**Table S2** Leakage current densities of c-PTU thin films.

|                 | Thickness<br>[nm] | Leakage Current Density <sup>a</sup><br>[ $\text{A cm}^{-2}$ ] |
|-----------------|-------------------|----------------------------------------------------------------|
| <b>c-PTU0.4</b> | 341               | $3.19 \times 10^{-9}$                                          |
| <b>c-PTU0.6</b> | 309               | $1.36 \times 10^{-9}$                                          |
| <b>c-PTU0.8</b> | 341               | $2.03 \times 10^{-9}$                                          |
| <b>c-PTU1.0</b> | 318               | $2.12 \times 10^{-9}$                                          |

<sup>a</sup> Measured at  $3 \text{ MV cm}^{-1}$ . <sup>b</sup> Measured at 1 kHz.

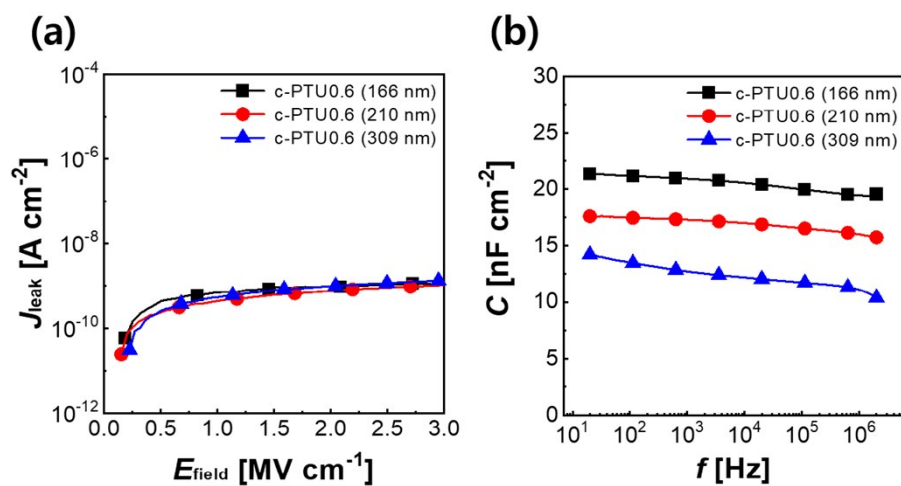

**Fig. S9** (a)  $J_{\text{leak}}$  as function of  $E_{\text{field}}$  and (b) capacitances as function of frequency of c-PTU0.6 thin films with different thicknesses.

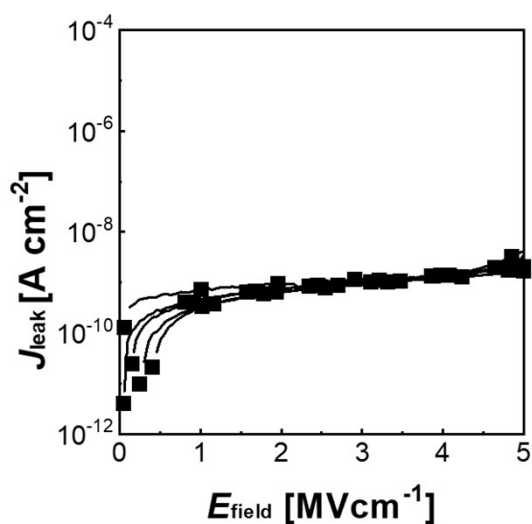

**Fig. S10** Reproducibility of  $J_{\text{leak}}$  of 200 nm-thick c-PTU0.6 thin films from five different MIM capacitors.

**Table S3** Comparison of breakdown electric field of polymer gate dielectrics in MIM capacitors.

|                         | Ref.                   | Thickness [nm] | $T^n$ [°C] | $\epsilon_r$  | Electric field [MV cm <sup>-1</sup> ] |                                    | $E_{bd}$ [MV cm <sup>-1</sup> ] |       |
|-------------------------|------------------------|----------------|------------|---------------|---------------------------------------|------------------------------------|---------------------------------|-------|
|                         |                        |                |            |               | 10 <sup>-10</sup> A/cm <sup>2</sup>   | 10 <sup>-8</sup> A/cm <sup>2</sup> |                                 |       |
| <b>PVP<sup>b</sup></b>  | S3                     | 12             | 200        | 3.2 (100 kHz) | -                                     | 1.0                                | > 3.0                           |       |
|                         | S4                     | 103            | 150        | 4.3 (1 kHz)   | -                                     | 0.5                                | -                               |       |
|                         | S5                     | 200            | 130        | 4.5           | -                                     | 1                                  | < 5                             |       |
|                         | S6                     | 200            | 180        | 5 (100 Hz)    | -                                     | 0.1                                | > 1                             |       |
|                         | S7                     | 60             | 200        | 2.5           | -                                     | -                                  | < 1                             |       |
|                         | S8                     | 250            | 180        | 5.5           | -                                     | -                                  | < 0.5                           |       |
|                         | S9                     | 350            | 180        | 5.66 (1 MHz)  | -                                     | -                                  | < 0.5                           |       |
|                         | <b>PVA<sup>c</sup></b> | S10            | 537        | 100           | 6.0 (100 kHz)                         | 1.0                                | -                               | > 1.9 |
|                         |                        | S11            | 248        | 100           | 6.3 (1 kHz)                           | -                                  | 2                               | > 2   |
| S12                     |                        | 300            | 100        | 3.2 (1 MHz)   | -                                     | 0.2                                | 0.45                            |       |
| <b>PMMA<sup>d</sup></b> | S13                    | 100            | 100        | 3.9(10 kHz)   | -                                     | 1                                  | -                               |       |
|                         | S14                    | 100            | 120        | 3 (1 kHz)     | -                                     | 1                                  | < 4                             |       |
| <b>Polyimide</b>        | S3                     | 9              | 250        | 2.6 (100 kHz) | -                                     | 1.0                                | > 2.5                           |       |
|                         | S15                    | 200            | 75         | 3.2 (100 Hz)  | 1                                     | 2                                  | < 2.5                           |       |
|                         | S16                    | 300            | -          | 3.3 (10 kHz)  | 3                                     | -                                  | > 3                             |       |
| <b>Parylene</b>         | S17                    | 200            | -          | 3.1           | -                                     | -                                  | 2.7                             |       |
|                         | S18                    | 330            | -          | 2.61 (1 MHz)  | -                                     | -                                  | 2.35                            |       |
| <b>c-PTU0.6</b>         | This work              | 200            | 90         | 4.1 (1 kHz)   | < 5                                   | < 5                                | > 5                             |       |

<sup>a</sup> Processing temperature, <sup>b</sup> Poly(4-vinylphenol), <sup>c</sup> Poly(vinyl alcohol), <sup>d</sup> Poly(methyl methacrylate)

**Table S4** Comparison of dielectric constants for polymer gate dielectrics before and after cross-linking reaction.

|                         | Ref.      | $T_c^a$<br>[°C] | $\epsilon_r$  |              |
|-------------------------|-----------|-----------------|---------------|--------------|
|                         |           |                 | <i>Before</i> | <i>After</i> |
| <b>PVP<sup>b</sup></b>  | S19       | 200             | 4.0 (10 Hz)   | 3.4          |
|                         | S20       | 200             | 3.9 (1 MHz)   | 3.5          |
| <b>PVA<sup>c</sup></b>  | S10       | 110             | 6.9 (100 kHz) | 6.0          |
|                         | S11       | 100             | 6.34 (1 kHz)  | 6.30         |
| <b>PMMA<sup>d</sup></b> | S12       | 200             | 3.15 (1 MHz)  | 2.8          |
| <b>c-PTU0.6</b>         | This work | 90              | 3.9 (1 kHz)   | 4.1          |

<sup>a</sup> Crosslinking temperature, <sup>b</sup> Poly(4-vinylphenol), <sup>c</sup> Poly(vinyl alcohol), <sup>d</sup> Poly(methyl methacrylate)

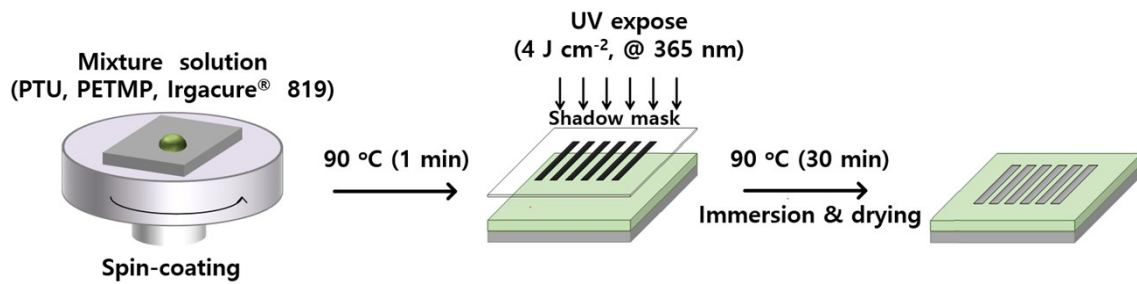

**Fig. S11** Schematic illustration of the photo-patterning process for c-PTU thin film.

## Surface Properties of c-PTU and sc-PTU Thin Films

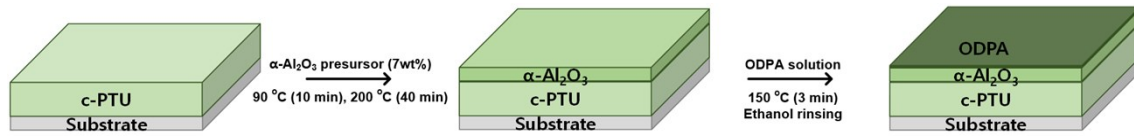

**Fig. S12** Schematic illustration of MAST process for c-PTU thin film.

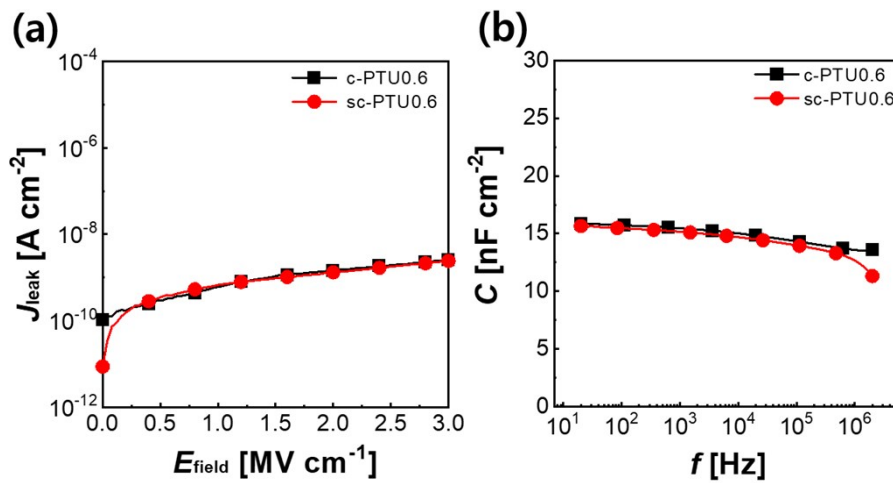

**Fig. S13** (a)  $J_{\text{leak}}$  as function of  $E_{\text{field}}$  and (b) capacitance as function of frequency of c-PTU0.6 and sc-PTU0.6 thin films.

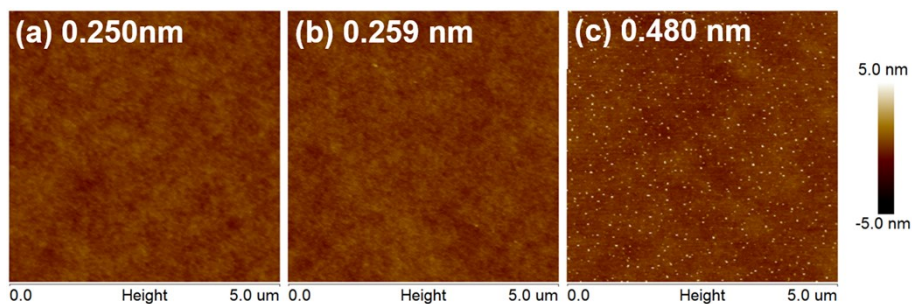

**Fig. S14** (a, b) AFM images of c-PTU0.6 thin film surfaces (a) before and (b) after immersion in NMP. (c) AFM images of sc-PTU0.6 thin film surface.

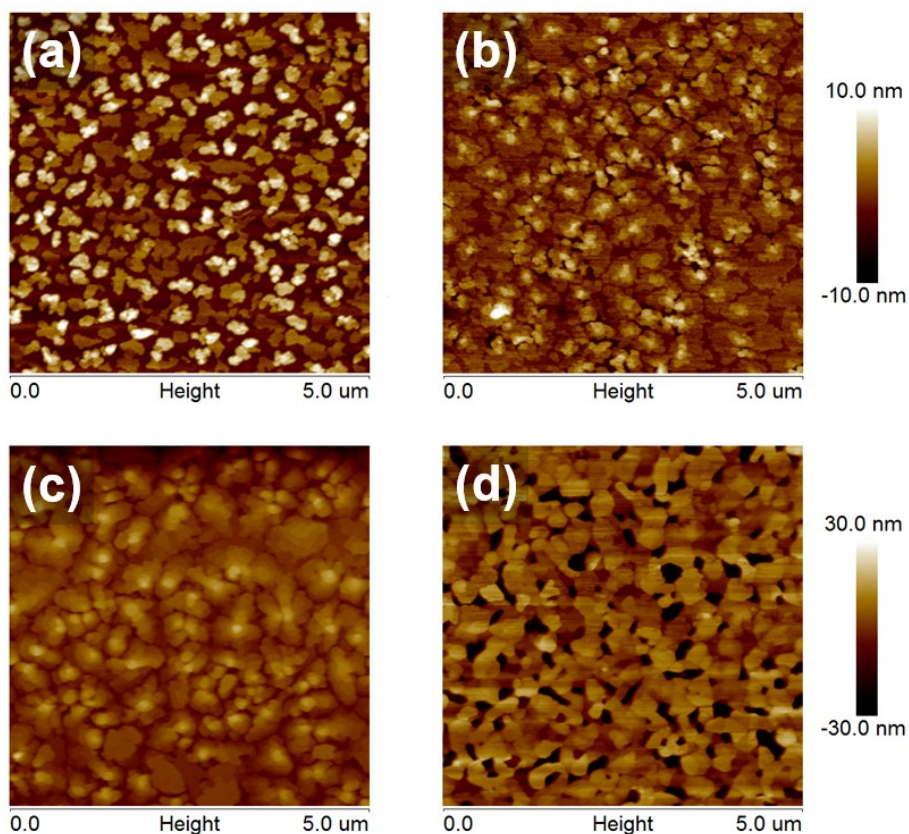

**Fig. S15** (a-c) AFM images of (a) 5 nm, (b) 10 nm, and (c) 60 nm DNTT thin films deposited on c-PTU0.6 thin films. (d) AFM image of 60 nm DNTT thin film deposited on sc-PTU0.6 thin film.

**Table S5** DI water and diiodomethane sessile drop contact angles and surface energies of the c-PTU0.6 and sc-PTU0.6 thin films.

|                  | Water<br>[°] | Diiodomethane<br>[°] | $\gamma^p$<br>[polar, dyne<br>$\text{cm}^{-1}$ ] | $\gamma^d$<br>[dispersive,<br>dyne $\text{cm}^{-1}$ ] | Surface Energy<br>[ $\gamma$ , dyne $\text{cm}^{-1}$ ] |
|------------------|--------------|----------------------|--------------------------------------------------|-------------------------------------------------------|--------------------------------------------------------|
| <b>c-PTU0.6</b>  | 67.60        | 26.5                 | 8.25                                             | 40.64                                                 | 48.88                                                  |
| <b>sc-PTU0.6</b> | 98.26        | 55.24                | 0.54                                             | 30.79                                                 | 31.34                                                  |

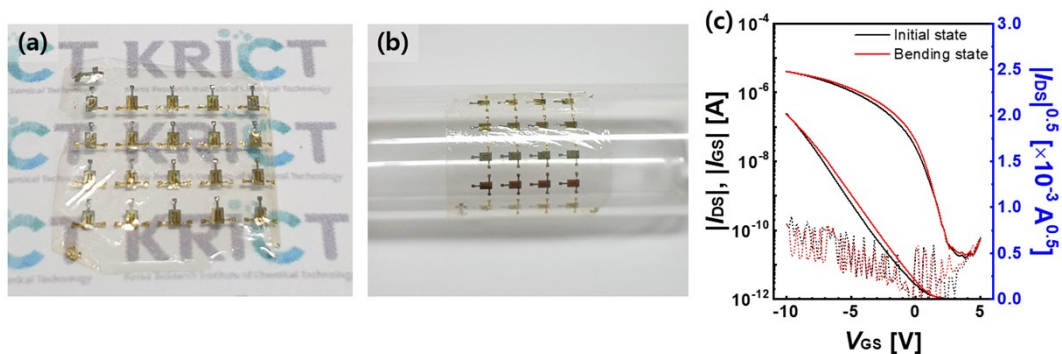

**Fig. S16** Photographs of DNTT-based OFET integrated with 3  $\mu\text{m}$ -thick poly-*para*-xylylene substrate as (a) fabricated and (b) bent. (c) Transfer curves for DNTT-based OFETs with sc-PTU gate dielectric as fabricated (black) and bent (red).

**Table S6** Electrical characteristics of DNTT-based OFET integrated with poly-*para*-xylylene substrate as fabricated and bent.

| Device state  | $\mu$ [ $\text{cm}^2/\text{Vs}$ ] | $V_{\text{th}}$ [V] | $SS$ [V/decade] | $I_{\text{on}}/I_{\text{off}}$ |
|---------------|-----------------------------------|---------------------|-----------------|--------------------------------|
| Initial state | 0.251                             | -0.067              | 1.05            | $2.35 \times 10^5$             |
| Bending state | 0.203                             | 0.77                | 0.82            | $1.81 \times 10^5$             |



## References for Electronic Supplementary Information

- S1 S. Kim, T. Ha, S. Yoo, J.-W. Ka, J. Kim, J. C. Won, D. H. Choi, K.-S. Jang and Y. H. Kim, *Phys. Chem. Chem. Phys.*, 2017, **19**, 15521–15529.
- S2 H. Klauk, U. Zschieschang, J. Pflaum and M. Halik, *Nature*, 2007, **445**, 745–748.
- S3 S. Y. Yang, S. H. Kim, K. Shin, H. Jeon and C. E. Park, *Appl. Phys. Lett.*, 2006, **88**, 2004–2007.
- S4 L. Feng, C. Jiang, H. Ma, X. Guo and A. Nathan, *Org. Electron.*, 2016, **38**, 186–192.
- S5 P. Vicca, S. Steudel, S. Smout, A. Raats, J. Genoe and P. Heremans, *Thin Solid Films*, 2010, **519**, 391–393.
- S6 S. C., M. P. Joshi and V. Singh, *Microelectron. Eng.*, 2018, **198**, 85–92.
- S7 K. Eum, K. Kim, J. Han and I. Chung, *J. Vac. Sci. Technol. A Vacuum, Surfaces, Film.*, 2010, **28**, 873–878.
- S8 B. K. Tehrani, C. Mariotti, B. S. Cook, L. Roselli and M. M. Tentzeris, *Org. Electron.*, 2016, **29**, 135–141.
- S9 K. Kim, N. Kwon and I. Chung, *Thin Solid Films*, 2014, **550**, 689–695.
- S10 S. H. Jin, J. S. Yu, C. A. Lee, J. W. Kim, B. G. Park and J. D. Lee, *J. Korean Phys. Soc.*, 2004, **44**, 181–184.
- S11 W. Sun, J. Zhao, S. Chen, X. Guo and Q. Zhang, *Synth. Met.*, 2019, **250**, 73–78.
- S12 M. Na and S.-W. Rhee, *Org. Electron.*, 2006, **7**, 205–212.
- S13 S. Jung, M. Albariqi, G. Gruntz, T. Al-Hathal, A. Peinado, E. Garcia-Caurel, Y. Nicolas, T. Toupance, Y. Bonnassieux and G. Horowitz, *ACS Appl. Mater. Interfaces*, 2016, **8**, 14701–14708.
- S14 T. Tippo, C. Thanachayanont, P. Muthitamongkol, C. Junin, M. Hietschold and A. Thanachayanont, *Thin Solid Films*, 2013, **546**, 180–184.
- S15 H. Park, S. Yoo, M. H. Yi, Y. H. Kim and S. Jung, *Org. Electron.*, 2019, **68**, 70–75.
- S16 J. M. Won, H. J. Suk, D. Wee, Y. H. Kim, J. W. Ka, J. Kim, T. Ahn, M. H. Yi and K. S. Jang, *Org. Electron. physics, Mater. Appl.*, 2013, **14**, 1777–1786.
- S17 K. Tsukagoshi, I. Yagi, K. Shigeto, K. Yanagisawa, J. Tanabe and Y. Aoyagi, *Appl. Phys. Lett.*, 2005, **87**, 183502.
- S18 E. Y. Shin, E. Y. Choi and Y. Y. Noh, *Org. Electron.*, 2017, **46**, 14–21.
- S19 H. Park, J. Kwon, B. Kang, W. Kim, Y.-H. Kim, K. Cho and S. Jung, *ACS Appl. Mater. Interfaces*, 2018, **10**, 24055–24063.
- S20 D. K. Hwang, J. H. Park, J. Lee, J.-M. Choi, J. H. Kim, E. Kim and S. Im, *J. Electrochem. Soc.*, 2006, **153**, G23.
